# Supplementary material for: Mechanistic Insight of Allantoin in Protecting Tomato Plants Against Ultraviolet C Stress
Source: PubMed Central journal article supplement (PMC7824269; doi:10.3390/plants10010011), 2020-12-23
Supplement: plants-10-00011-s001.pdf [file plants-10-00011-s001.pdf]

## Supplementary file

### Supporting Materials and Methods

#### *Determination of the lethal dose of UVC and optimal dose of AT*

Plastic pots lined with a plastic bag containing 1 kg clay soil were used for sub-culturing of 40 day-old tomato transplants (3 plants pot<sup>-1</sup>). The pots were divided into five lots (five pots lot<sup>-1</sup>) receiving different irradiance of 0, 0.3, 0.6, 1.2, 1.8 W m<sup>-2</sup>. The control group (not treated with UVC) was grown under natural conditions. Plant height (PH) and root length (RL) were measured after 7 days after treatment. Shoot and root dry matter content was measured by drying the plant material at 80 °C for 48 h. AT and allantoate contents were determined in leaves samples.

Different concentrations of AT (10<sup>-2</sup>, 10<sup>-4</sup>, 10<sup>-6</sup>, 10<sup>-7</sup>, 10<sup>-8</sup>, and 10<sup>-10</sup> M) were applied to 40 day-old tomato plants as a foliar spray. Each plant was sprayed with 20 mL of AT solution at the desired concentration. Then the plants were subjected to UVC dose at the first irradiance does (provided from the previous experiment) caused a reduction of foliar AT and allantoate of tomato plants. The UVC lamps were stabilized by turning on lamps at 11:00 AM for the calculated time of each irradiance treatment and then closed, this process was conducted for three days. One week after the last UVC dose, the plants were harvested for morphological parameters as well as foliar AT and allantoate contents.

### Supplementary Figures and Tables

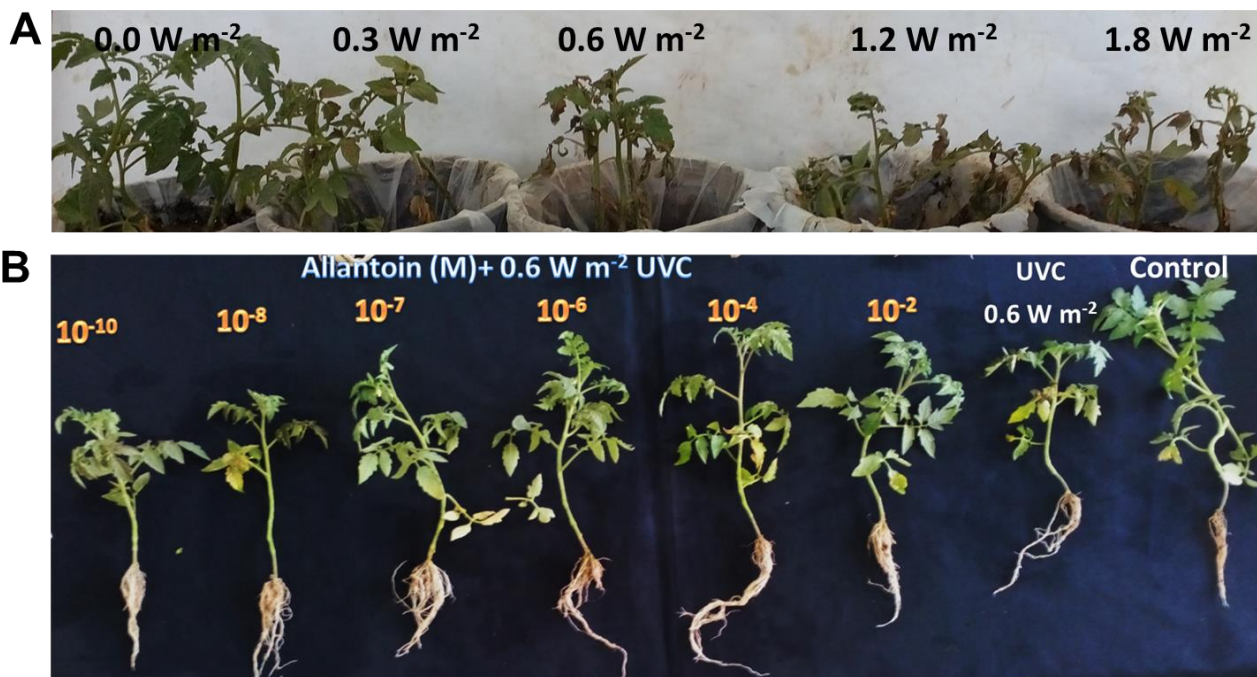

**Figure S1.** (A) Effects of different levels of UVC on phenotypes of tomato plants. (B) Phenotypic appearance of different concentrations of allantoin pre-treated tomato plants exposed to UVC stress.

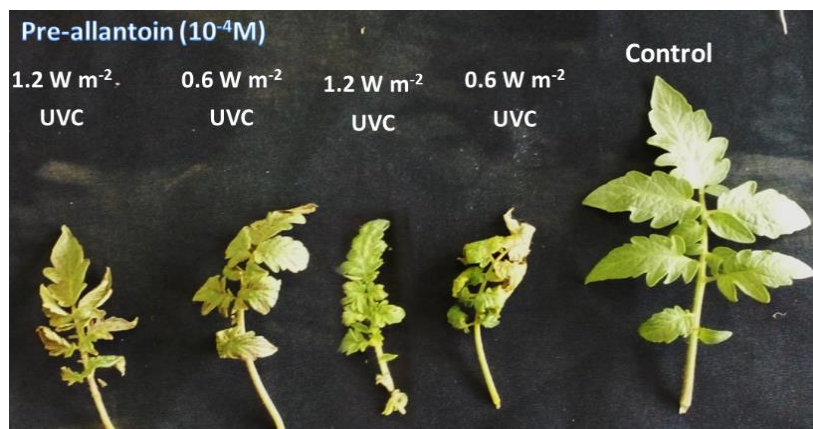

**Figure S2.** Leaf phenotypic appearance of allantoin (100 nM) pre-treated tomato plants in absence or presence of UVC ( $0.6 \text{ W m}^{-2}$ ) stress.

**Table S1.** Effect of different doses of UVC stress on tomato plants

| UVC exposure           | SFW (g)             | RFW (g)            | SDW (g)            | RDW (g)            | Allantoin ( $\text{mg g}^{-1}$ FW) | Allantoate ( $\text{mg g}^{-1}$ FW) |
|------------------------|---------------------|--------------------|--------------------|--------------------|------------------------------------|-------------------------------------|
| $0 \text{ W m}^{-2}$   | 4.973 <sup>a</sup>  | 1.633 <sup>a</sup> | 0.965 <sup>a</sup> | 0.237 <sup>a</sup> | 524.224 <sup>a</sup>               | 634.894 <sup>a</sup>                |
| $0.3 \text{ W m}^{-2}$ | 3.286 <sup>b</sup>  | 1.180 <sup>b</sup> | 0.508 <sup>b</sup> | 0.195 <sup>b</sup> | 560.434 <sup>a</sup>               | 646.980 <sup>a</sup>                |
| $0.6 \text{ W m}^{-2}$ | 2.156 <sup>bc</sup> | 0.863 <sup>c</sup> | 0.439 <sup>b</sup> | 0.080 <sup>c</sup> | 447.467 <sup>b</sup>               | 517.441 <sup>b</sup>                |
| $1.2 \text{ W m}^{-2}$ | 2.053 <sup>bc</sup> | 0.627 <sup>d</sup> | 0.363 <sup>c</sup> | 0.070 <sup>c</sup> | 370.215 <sup>c</sup>               | 448.437 <sup>c</sup>                |
| $1.8 \text{ W m}^{-2}$ | 1.318 <sup>c</sup>  | 0.330 <sup>e</sup> | 0.242 <sup>d</sup> | 0.038 <sup>d</sup> | 286.986 <sup>d</sup>               | 330.974 <sup>d</sup>                |

Values are means of five replicates ( $n = 5$ ). Means followed by the same letter are non-significant among the treatments within the same column at  $P \leq 0.05$  considering Tukey's test. SFW, shoot fresh weight; RFW, root fresh weight; SDW, shoot dry weight; RDW, root dry weight;

**Table S2.** Effect of different doses of allantoin (AT) in tomato plants under UVC stress

| Treatments                     | SFW (g)                  | RFW (g)             | Allantoin ( $\text{mg g}^{-1}$ FW) | Allantoate ( $\text{mg g}^{-1}$ FW) |
|--------------------------------|--------------------------|---------------------|------------------------------------|-------------------------------------|
| Control                        | 9.247 <sup>a</sup>       | 2.610 <sup>cd</sup> | 629.558 <sup>d</sup>               | 751.088 <sup>c</sup>                |
| $0.6 \text{ W m}^{-2}$ (UV0.6) | 5.071 <sup>d</sup>       | 1.972 <sup>d</sup>  | 504.000 <sup>e</sup>               | 679.350 <sup>d</sup>                |
| UV0.6+ $10^{-2}$ M AT          | 6.423 <sup>bcd</sup>     | 4.941 <sup>a</sup>  | 673.229 <sup>cd</sup>              | 793.626 <sup>bc</sup>               |
| UV0.6+ $10^{-4}$ M AT          | <b>7.340<sup>b</sup></b> | 3.381 <sup>b</sup>  | <b>846.598<sup>a</sup></b>         | <b>945.221<sup>a</sup></b>          |
| UV0.6+ $10^{-6}$ M AT          | 6.754 <sup>bc</sup>      | 2.513 <sup>cd</sup> | 736.439 <sup>b</sup>               | 829.942 <sup>b</sup>                |
| UV0.6+ $10^{-7}$ M AT          | 5.768 <sup>cd</sup>      | 2.884 <sup>bc</sup> | 717.218 <sup>bc</sup>              | 783.217 <sup>bc</sup>               |
| UV0.6+ $10^{-8}$ M AT          | 5.427 <sup>cd</sup>      | 2.116 <sup>d</sup>  | 691.323 <sup>bc</sup>              | 766.627 <sup>bc</sup>               |
| UV0.6+ $10^{-10}$ M AT         | 5.024 <sup>d</sup>       | 2.011 <sup>d</sup>  | 686.118 <sup>bcd</sup>             | 759.509 <sup>bc</sup>               |

Values are means of five replicates ( $n = 5$ ). Means followed by the same letter are non-significant among the treatments within the same column at  $P \leq 0.05$  considering Tukey's test. SFW, shoot fresh weight; RFW,

**Table S3.** Effects of pre-treatment and post-treatment of allantoin (AT) on water relation parameters in tomato plants grown 15 days in the presence or absence of UVC stress.

| Treatments | WLR                     | ELWR (%)                 | RT (g H <sub>2</sub> O min <sup>-1</sup> cm <sup>2</sup> × 10 <sup>5</sup> ) |
|------------|-------------------------|--------------------------|------------------------------------------------------------------------------|
| C          | 4.80±0.17 <sup>e</sup>  | 83.95±0.84 <sup>cd</sup> | 15.10±1.99 <sup>efg</sup>                                                    |
| UVC1       | 3.64±0.13 <sup>ab</sup> | 71.72±1.39 <sup>a</sup>  | 19.42±0.66 <sup>ab</sup>                                                     |
| UVC2       | 2.98±0.11 <sup>c</sup>  | 57.56±0.73 <sup>b</sup>  | 24.91±1.52 <sup>c</sup>                                                      |
| Pre-AT     | 5.63±0.05 <sup>d</sup>  | 88.76±0.68 <sup>c</sup>  | 10.76±0.30 <sup>d</sup>                                                      |
| AT+ UVC1   | 4.42±0.17 <sup>ef</sup> | 82.32±0.58 <sup>d</sup>  | 14.26±0.87 <sup>ef</sup>                                                     |
| AT+ UVC2   | 3.73±0.29 <sup>ab</sup> | 79.52±0.59 <sup>d</sup>  | 17.00±1.80 <sup>abg</sup>                                                    |
| Post-AT    | 4.76±0.48 <sup>e</sup>  | 87.95±1.67 <sup>c</sup>  | 12.98±0.32 <sup>df</sup>                                                     |
| UVC1+AT    | 4.05±0.15 <sup>af</sup> | 79.52±0.59 <sup>d</sup>  | 17.94±0.66 <sup>abg</sup>                                                    |
| UVC1+AT    | 3.13±0.11 <sup>bc</sup> | 61.53±4.05 <sup>b</sup>  | 20.72±0.92 <sup>b</sup>                                                      |

Values are means ± standard deviation (SDs) ( $n = 5$ ). Means followed by the same letter are non-significant among the treatments within the same column at  $P \leq 0.05$  considering Tukey's test. WLR, water loss rate; ELWR, excised leaf water retention; RT, residual transpiration. 'C', no AT and grown under non-stress condition; 'UVC1', exposed to 0.6 W m<sup>-2</sup> UVC irradiation; 'UVC2', exposed to 1.2 W m<sup>-2</sup> UVC irradiation; 'Pre-AT', pretreated with 100 nM AT and after that exposed to 0 W m<sup>-2</sup> UVC irradiation; 'AT+UVC1', pretreated with 100 nM AT and after that exposed to 0.6 W m<sup>-2</sup> UVC irradiation; 'AT+UVC2', pretreated with 100 nM AT and after that exposed to 1.2 W m<sup>-2</sup> UVC irradiation; 'Post-AT', exposed to 0 W m<sup>-2</sup> UVC irradiation and after that post-treated with 100 nM AT; 'UVC1+AT', exposed to 0.6 W m<sup>-2</sup> UVC irradiation and after that post-treated with 100 nM AT; 'UVC2+AT', exposed to 1.2 W m<sup>-2</sup> UVC irradiation and after that post-treated with 100 nM AT.

**Table S4.** F-statistics and  $P$  values of all studied parameters from two-way ANOVA

| Parameters   | F-value       |              |                     | P value       |              |                     |
|--------------|---------------|--------------|---------------------|---------------|--------------|---------------------|
|              | Factor 1: UVC | Factor 2: AT | Interaction: UVC×AT | Factor 1: UVC | Factor 2: AT | Interaction: UVC×AT |
| RGR          | 661.66        | 110.30       | 18.00               | <0.0001       | <0.0001      | <0.0001             |
| SFW          | 1116.29       | 259.20       | 9.30                | <0.0001       | <0.0001      | <0.0001             |
| RFW          | 1384.93       | 238.12       | 14.01               | <0.0001       | <0.0001      | <0.0001             |
| SDW          | 2143.23       | 388.89       | 168.84              | <0.0001       | <0.0001      | <0.0001             |
| RDW          | 1027.45       | 120.46       | 15.39               | <0.0001       | <0.0001      | <0.0001             |
| Chl <i>a</i> | 900.01        | 315.99       | 32.78               | <0.0001       | <0.0001      | <0.0001             |
| Chl <i>b</i> | 424.62        | 216.98       | 46.13               | <0.0001       | <0.0001      | <0.0001             |
| Carotenoids  | 647.80        | 1148.21      | 200.02              | <0.0001       | <0.0001      | <0.0001             |
| SP           | 65.63         | 207.57       | 3.25                | <0.0001       | <0.0001      | 0.036               |
| SC           | 694.87        | 270.09       | 20.54               | <0.0001       | <0.0001      | <0.0001             |
| FAA          | 157.32        | 30.71        | 4.31                | <0.0001       | <0.0001      | 0.013               |
| Proline      | 1214.53       | 1290.95      | 495.11              | <0.0001       | <0.0001      | <0.0001             |
| WLR          | 143.82        | 30.43        | 1.16                | <0.0001       | <0.0001      | 0.362               |
| ELWR         | 332.63        | 120.95       | 29.11               | <0.0001       | <0.0001      | <0.0001             |
| RT           | 103.89        | 55.75        | 2.29                | <0.0001       | <0.0001      | 0.099               |
| RWC          | 27.87         | 26.60        | 5.08                | <0.0001       | <0.0001      | 0.006               |
| Wax          | 185.48        | 180.48       | 1.85                | <0.0001       | <0.0001      | 0.164               |
| AsA          | 24.16         | 222.05       | 16.04               | <0.0001       | <0.0001      | <0.0001             |
| GSH          | 64.65         | 40.65        | 8.90                | <0.0001       | <0.0001      | <0.0001             |

|                               |         |         |        |         |         |         |
|-------------------------------|---------|---------|--------|---------|---------|---------|
| $\alpha$ -tocopherol          | 0.80    | 248.53  | 13.95  | 0.464   | <0.0001 | <0.0001 |
| Anthocyanin                   | 5 16.27 | 162.08  | 17.09  | <0.0001 | <0.0001 | <0.0001 |
| Flavonoids                    | 172.31  | 230.26  | 68.53  | <0.0001 | <0.0001 | <0.0001 |
| TPC                           | 844.89  | 580.97  | 50.47  | <0.0001 | <0.0001 | <0.0001 |
| MDA                           | 303.64  | 71.54   | 34.78  | <0.0001 | <0.0001 | <0.0001 |
| LOX                           | 2174.02 | 418.35  | 252.91 | <0.0001 | <0.0001 | <0.0001 |
| MG                            | 3029.33 | 302.67  | 96.81  | <0.0001 | <0.0001 | <0.0001 |
| Allantoate                    | 106.68  | 675.16  | 150.11 | <0.0001 | <0.0001 | <0.0001 |
| Allantoin                     | 237.76  | 739.64  | 138.81 | <0.0001 | <0.0001 | <0.0001 |
| OA                            | 52.22   | 9.94    | 4.25   | <0.0001 | <0.0001 | 0.014   |
| H <sub>2</sub> S              | 98.96   | 505.95  | 75.73  | <0.0001 | <0.0001 | <0.0001 |
| NO                            | 2009.02 | 234.15  | 129.33 | <0.0001 | <0.0001 | <0.0001 |
| O <sub>2</sub> <sup>•-</sup>  | 534.04  | 205.58  | 26.17  | <0.0001 | <0.0001 | <0.0001 |
| <sup>•</sup> OH               | 630.90  | 56.95   | 16.44  | <0.0001 | <0.0001 | <0.0001 |
| H <sub>2</sub> O <sub>2</sub> | 629.37  | 613.76  | 288.05 | <0.0001 | <0.0001 | <0.0001 |
| CAT                           | 334.83  | 634.75  | 64.79  | <0.0001 | <0.0001 | <0.0001 |
| APX                           | 10.97   | 1543.27 | 35.66  | 0.001   | <0.0001 | <0.0001 |
| IPO                           | 1190.29 | 329.10  | 132.84 | <0.0001 | <0.0001 | <0.0001 |
| SPO                           | 898.43  | 265.07  | 95.92  | <0.0001 | <0.0001 | <0.0001 |
| PPO                           | 1881.39 | 170.87  | 51.66  | <0.0001 | <0.0001 | <0.0001 |
| GPX                           | 749.92  | 1148.56 | 290.86 | <0.0001 | <0.0001 | <0.0001 |
| GST                           | 606.92  | 328.81  | 89.22  | <0.0001 | <0.0001 | <0.0001 |
| SOD                           | 216.07  | 1198.34 | 52.90  | <0.0001 | <0.0001 | <0.0001 |
| PAL                           | 1040.96 | 338.98  | 81.21  | <0.0001 | <0.0001 | <0.0001 |
| NR                            | 55.56   | 23.65   | 1.22   | <0.0001 | <0.0001 | 0.337   |
